# Supplementary material for: Transcriptomic Adjustments in a Freshwater Ectoparasite Reveal the Role of Molecular Plasticity for Parasite Host Shift
Source: MDPI journal article supplement (doi:10.3390/genes13030525), 2022-03-16
Supplement: s1 [file s1]

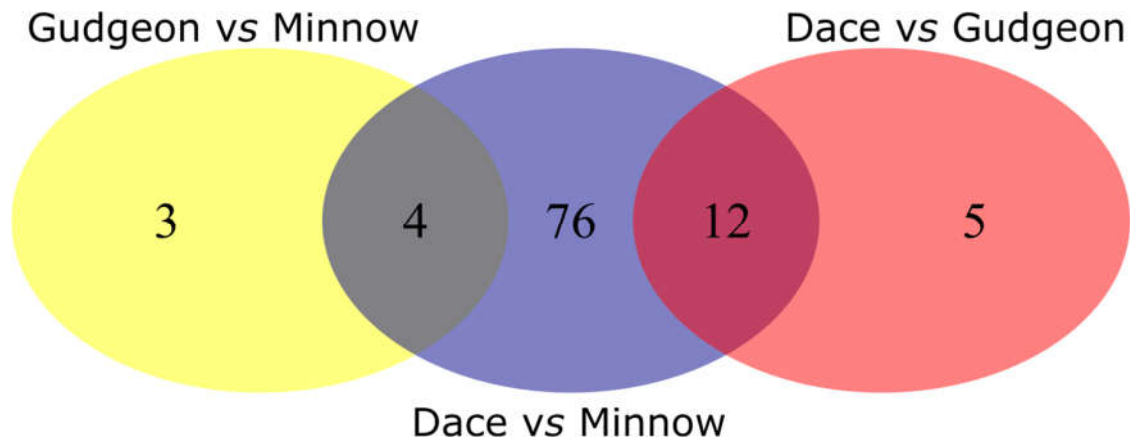

**Figure S1.** Venn diagram presenting the genes shared between the different pairwise comparisons between parasites exploiting different host species. Pairwise comparisons are named after the name of the host species on which *T. polycolpus* was collected (eg. Gudgeon vs. Minnow refers to the comparison between parasites sampled on gudgeon and parasites sampled on minnow).
