# Supplementary material for: Transcriptomic Adjustments in a Freshwater Ectoparasite Reveal the Role of Molecular Plasticity for Parasite Host Shift
Source: MDPI journal article supplement (doi:10.3390/genes13030525), 2022-03-16
Supplement: s1 [file s1]

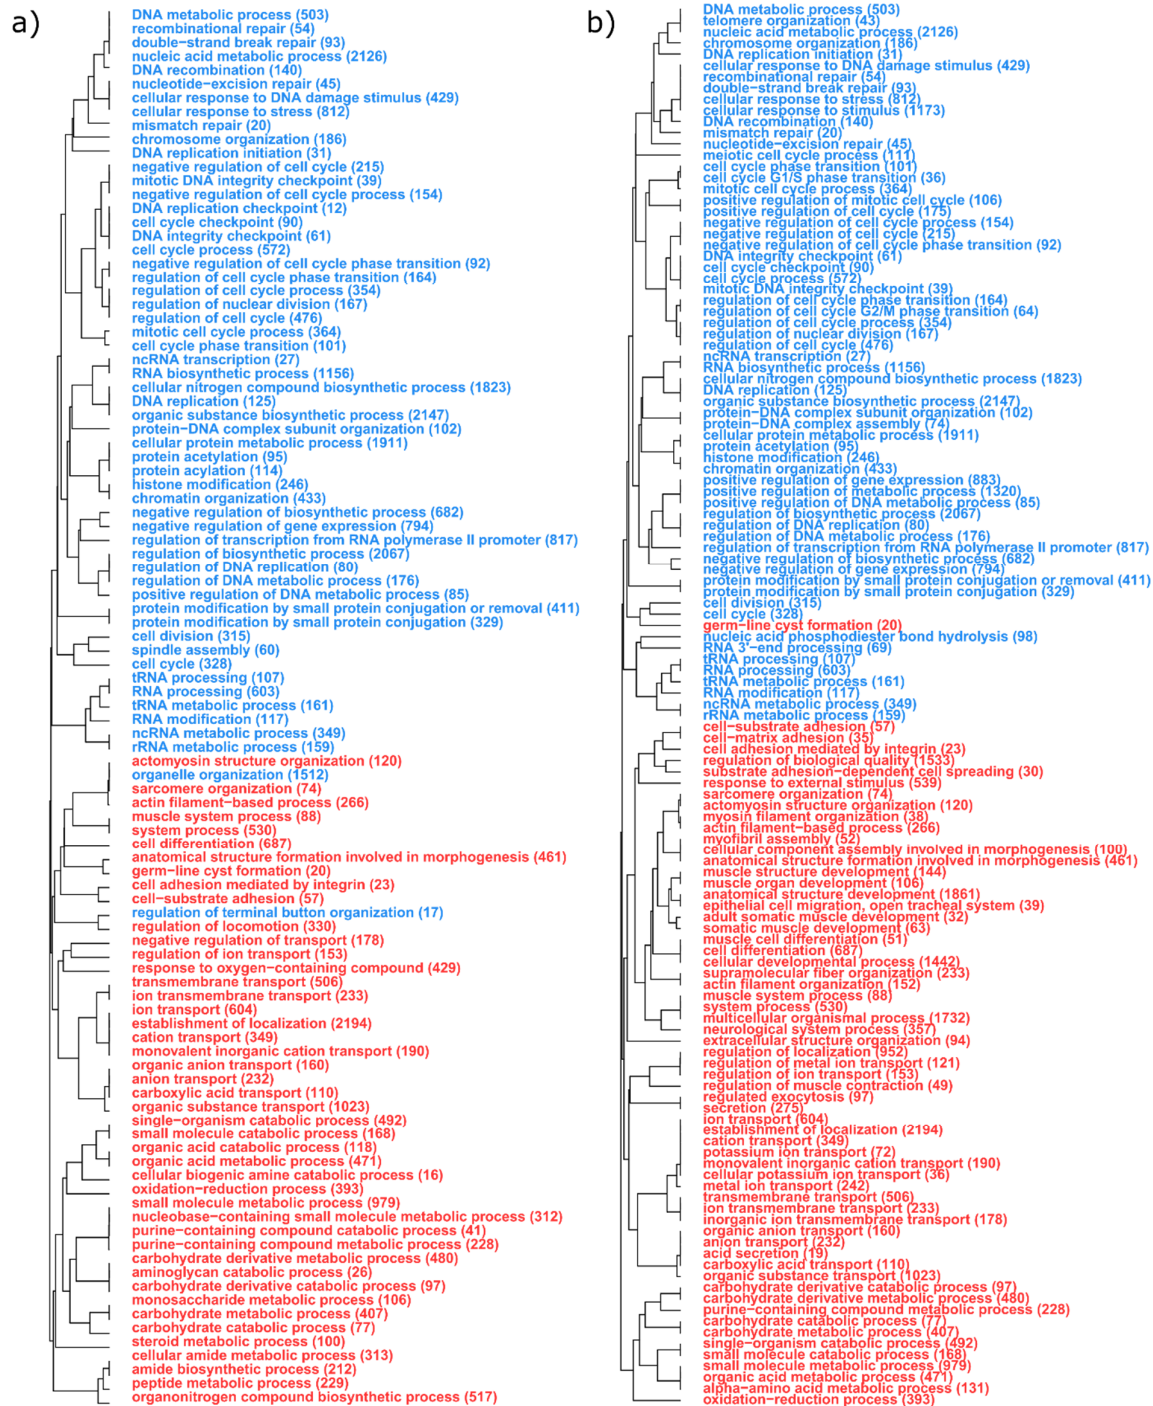

**Figure S2.** Gene ontologies (GOs) significantly enriched in differentially expressed genes (FDR < 0.001) for the comparison between (a) parasites infecting minnow and dace and (b) parasites infecting gudgeon and dace. Blue GOs refer to GOs enriched in under-expressed genes between alternative host parasites compared to principal host parasites, and red GOs refer to GOs enriched in over-expressed genes between alternative host parasites compared to principal host parasites. The total number of genes involved in each GO is given in brackets.
