# Supplementary material for: Transcriptomic Adjustments in a Freshwater Ectoparasite Reveal the Role of Molecular Plasticity for Parasite Host Shift
Source: MDPI journal article supplement (doi:10.3390/genes13030525), 2022-03-16
Supplement: s1 [file s1]

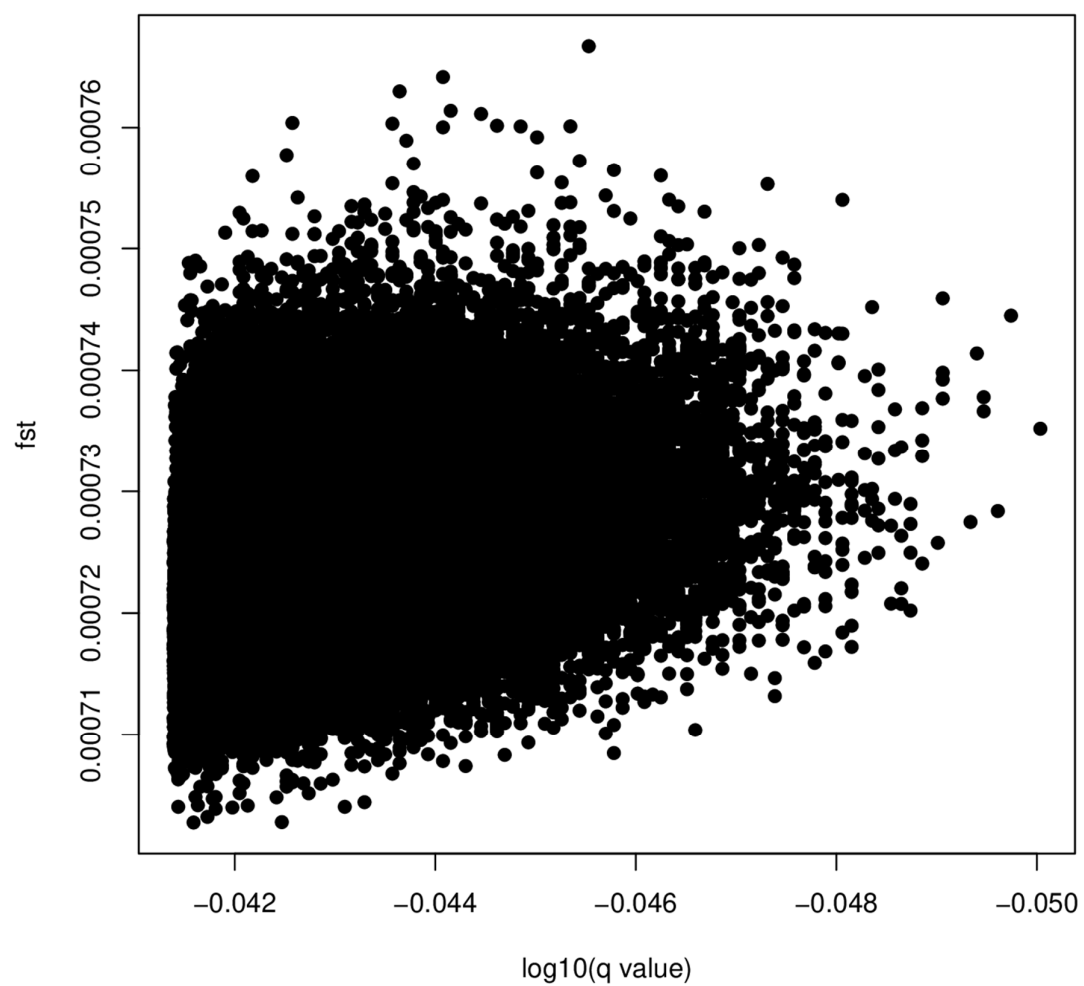

**Figure S3.** Plot showing  $F_{st}$  values and corresponding log transformed adjusted p-values for the 53 645 high-quality SNPs identified from *T. polycarpus* RNA-sequencing. Each dot represents a single SNP; none of them has been identified as a significant outlier.
